# Supplementary material
Source: MDPI journal article supplement (https://www.mdpi.com/2075-5309/13/10/2506)
Supplement: s1 [file s1]

# **SUSTAINABILITY OF THE INDUSTRIAL CLUSTERS IN SLOVAKIA**

SLOVAK UNIVERSITY OF TECHNOLOGY IN BRATISLAVA  
FACULTY OF ARCHITECTURE AND DESIGN

doc. Ing. arch. Ľubica Ilkovičová, PhD.  
doc. Ing. arch. Ján Ilkovič, PhD.  
Ing. arch. Yakoub Meziani, PhD.

**S U P P L E M E N T A R Y   M A T E R I A L**

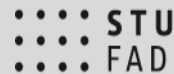

**Table 1.** Overview of Slovak regions with localities suitable for cluster developments

| No            | Region          | Total number of localities | I. Very suitable | II. Suitable | III. Less suitable | IV. Unclassified |
|---------------|-----------------|----------------------------|------------------|--------------|--------------------|------------------|
| 1.            | Banskobystrický | 76                         | 15               | 40           | 20                 | 0                |
| 2.            | Bratislavský    | 21                         | 1                | 13           | 7                  | 0                |
| 3.            | Košický         | 76                         | 22               | 32           | 17                 | 1                |
| 4.            | Nitriansky      | 87                         | 10               | 47           | 12                 | 17               |
| 5.            | Prešovský       | 71                         | 16               | 44           | 10                 | 3                |
| 6.            | Trenčiansky     | 96                         | 6                | 42           | 37                 | 11               |
| 7.            | Trnavský        | 62                         | 4                | 37           | 21                 | 3                |
| 8.            | Žilinský        | 40                         | 9                | 23           | 7                  | 0                |
| <b>All-in</b> |                 | <b>529</b>                 | <b>83</b>        | <b>278</b>   | <b>131</b>         | <b>35</b>        |

Sources

[https://www.minzp.sk/files/postupy-a-ziadosti/posudzovanie-vplyvov-na-zp/dokumenty/9-sprava\\_kap\\_1\\_az\\_8.pdf](https://www.minzp.sk/files/postupy-a-ziadosti/posudzovanie-vplyvov-na-zp/dokumenty/9-sprava_kap_1_az_8.pdf)

## 1a Models of clusters\_results

Aplication on examples

Decentric model

3

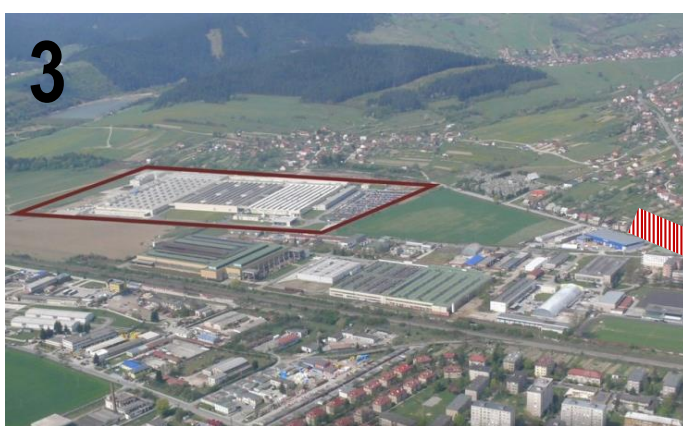

Industrial park Kysucké Nové Mesto

## Industrial parks Region Žilina and environs

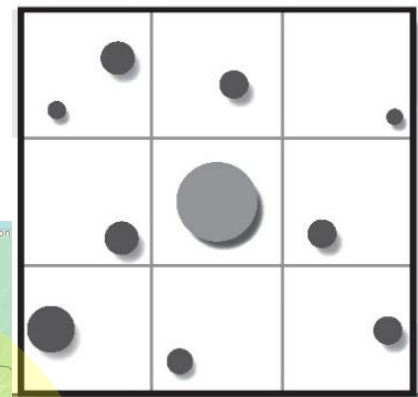

Decentric  
model

2

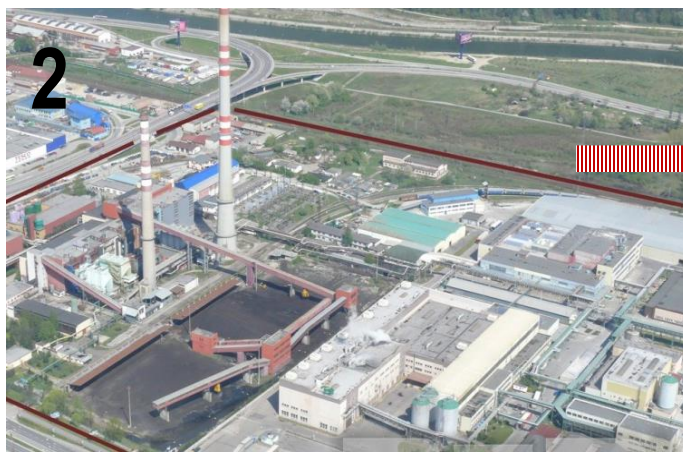

Industrial park Žilina\_Tento

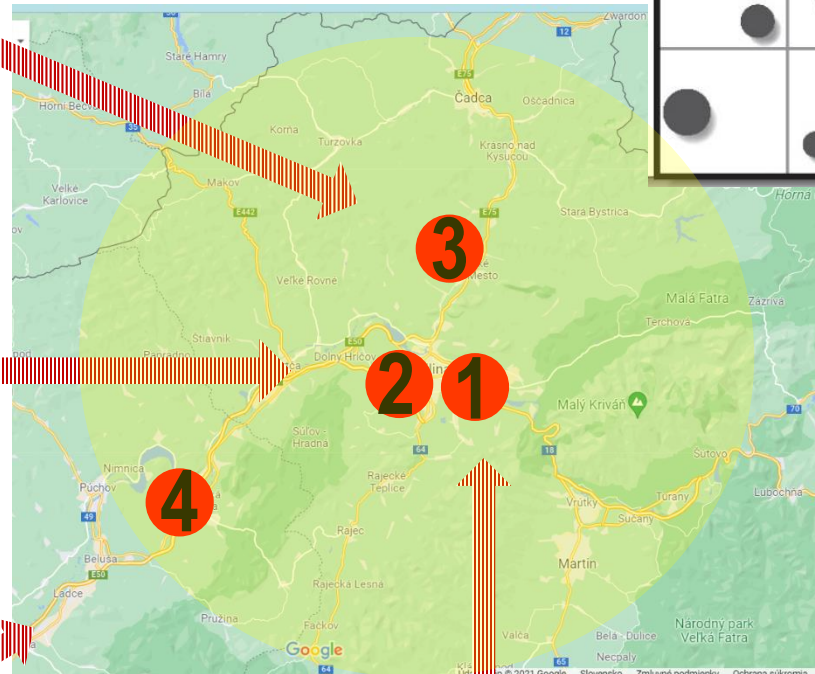

4

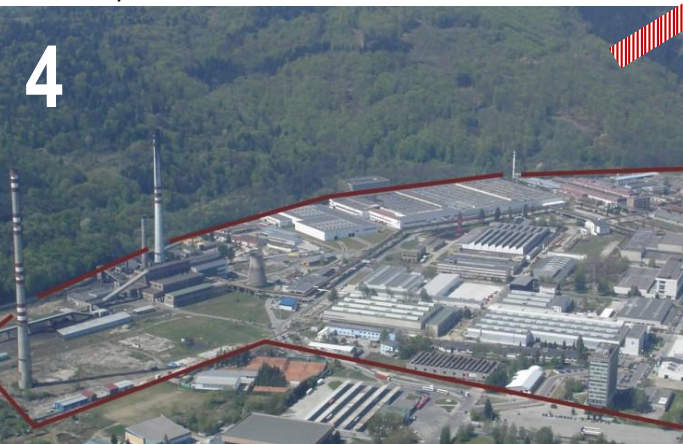

Industrial park  
Púchov

Industrial park  
Žilina East

1

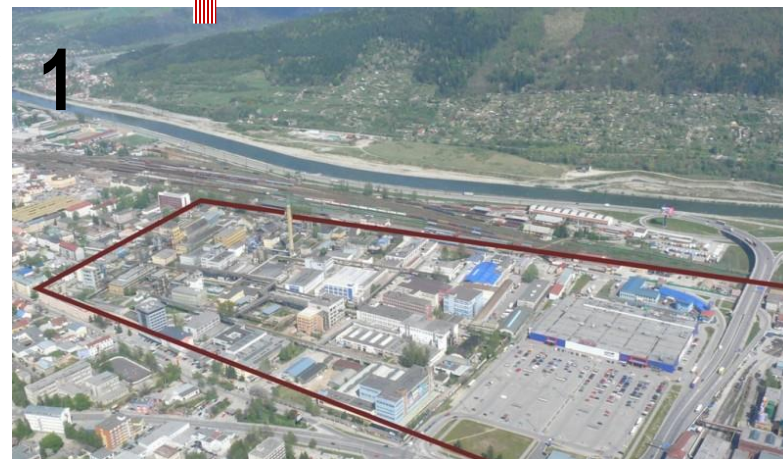

## 1b Models of clusters\_results

Application on examples

Centric model – indirect links

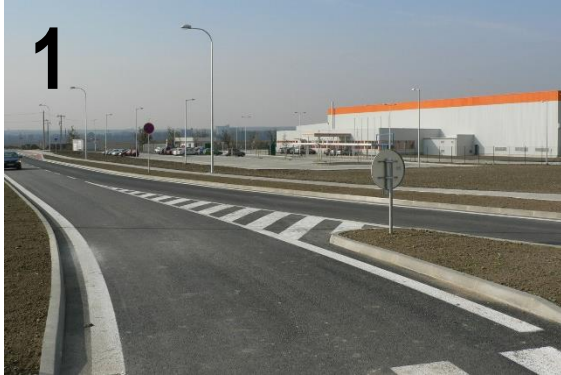

1

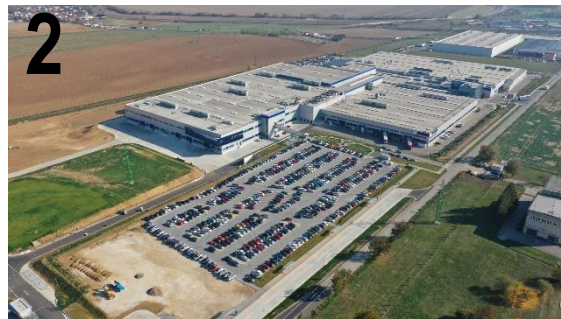

2

<https://stavbaroka.zoznam.sk/portfolio/zkw-krusovce-expansion-vyrobného-areálu>

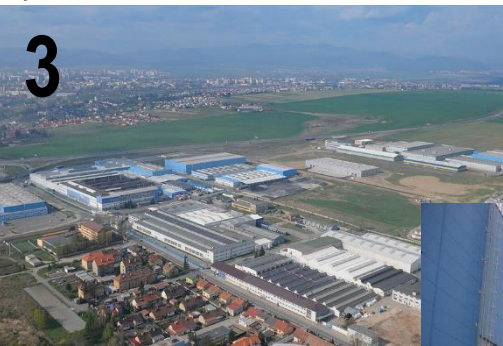

3

<http://www.pppoprad.sk/galeria.html>

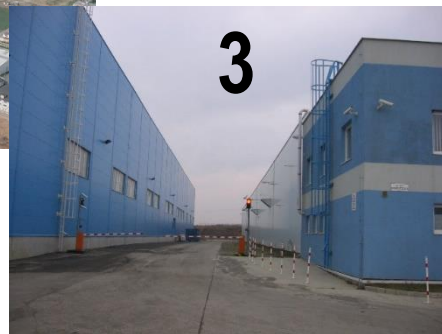

3

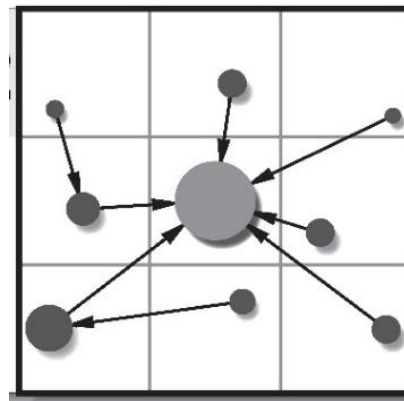

Centric model  
— indirect links

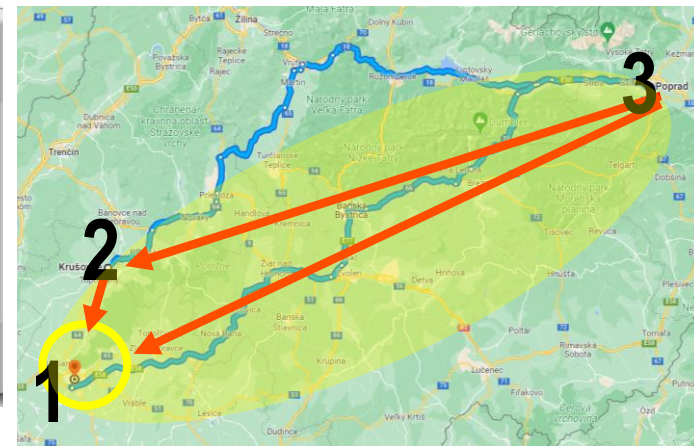

Krušovce → Nitra ← Poprad

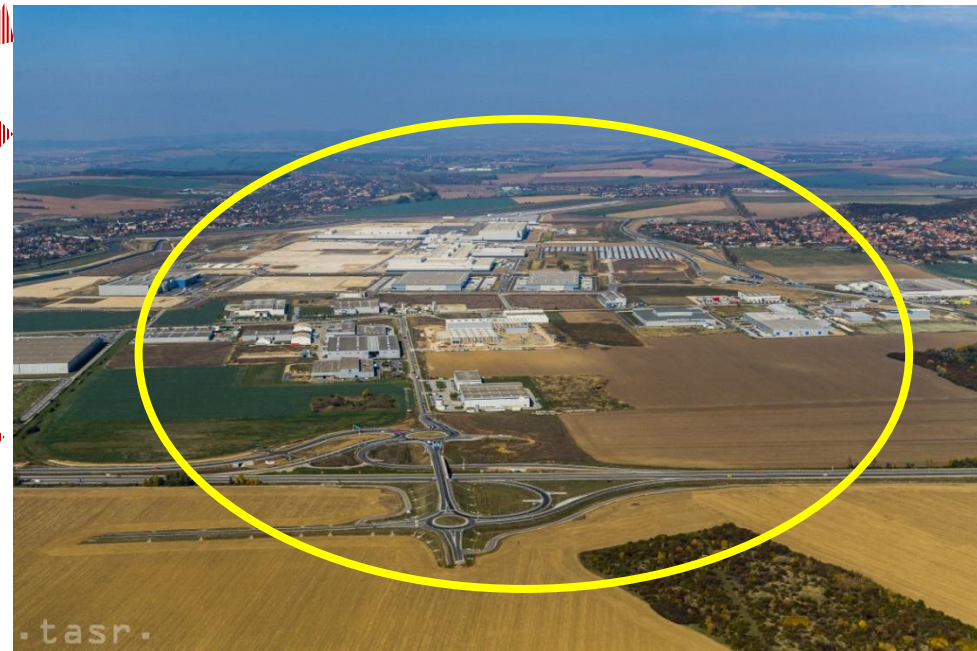

<https://rodinnestriebro.tasr.sk/picture.php?/520>  
Jaguar Land Rover

## 1c Models of clusters\_results

Application on examples

Centric model – direct links

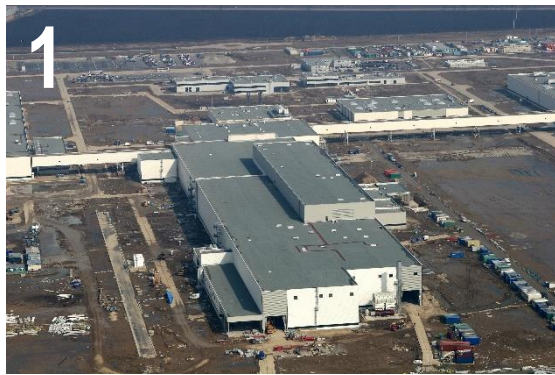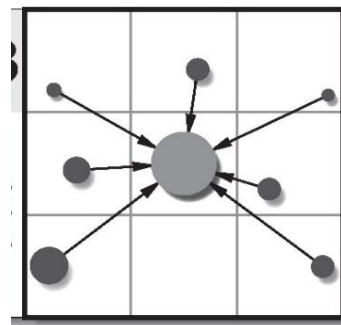

Centric model  
– direct links

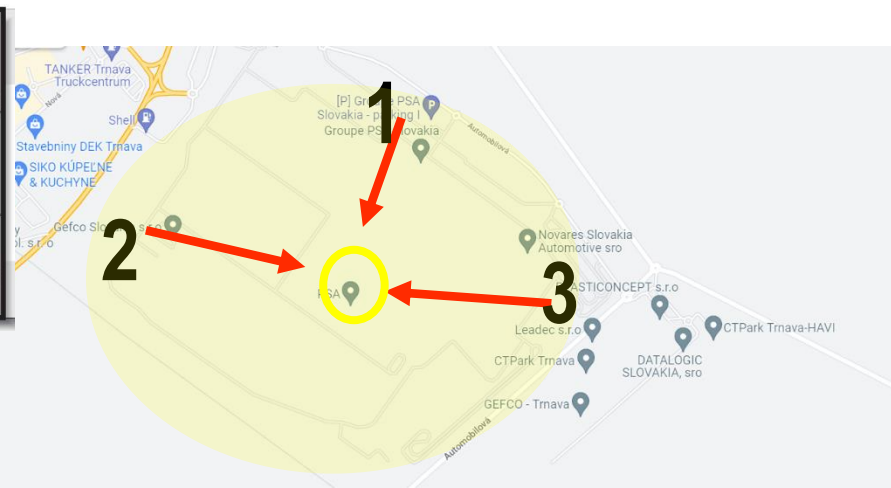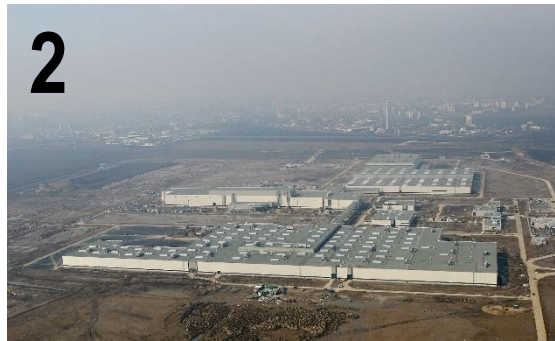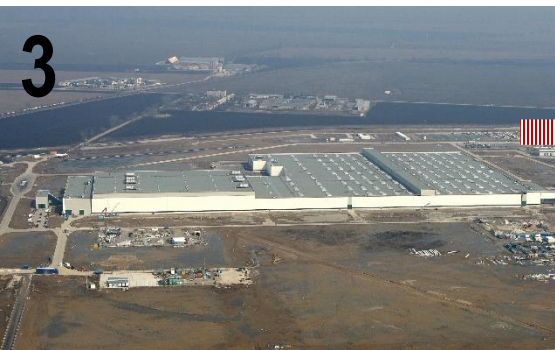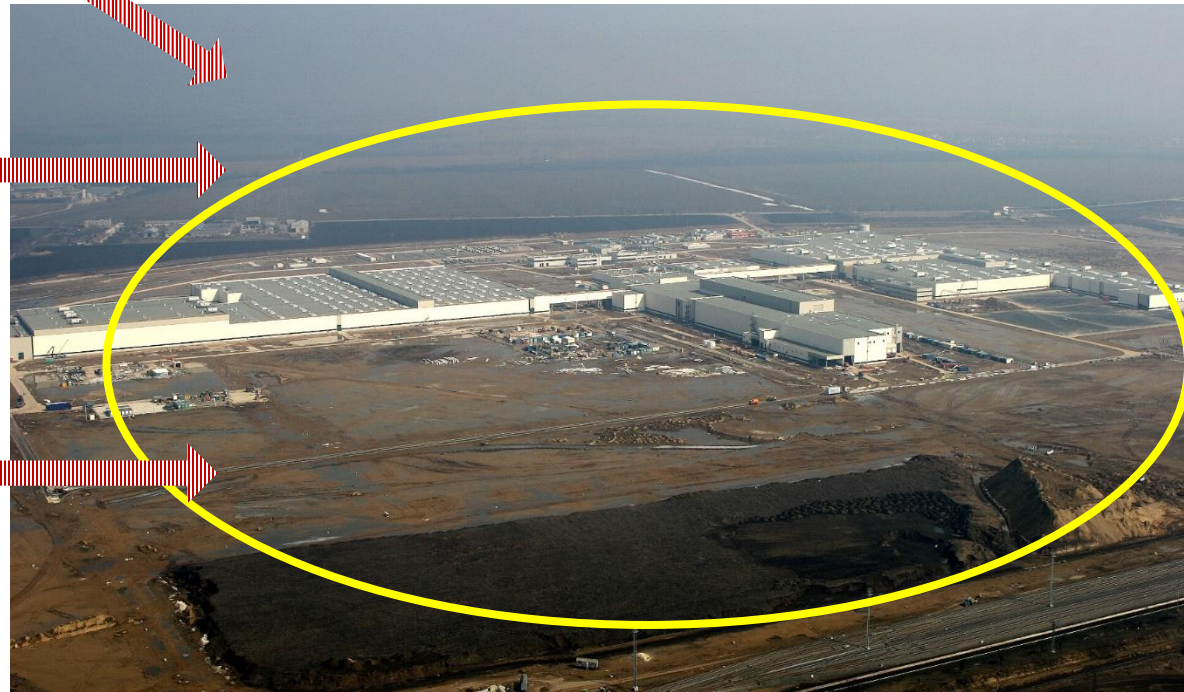

Groupe PSA Slovakia \_ TRNAVA

photo sources: Ilkovič, J. Novodobý fenomén výroby–priemyselný park (poznatky teórie a architektonickej praxe). (New production phenomenon – industrial park (knowledge from theory and architectural practice)). *Životné prostredie* **2002**, 36, 185-190, (in Slovak).

## **2 Phenomenon – architecture and sustainability of clusters**

# Phenomenon – architecture and sustainability of clusters

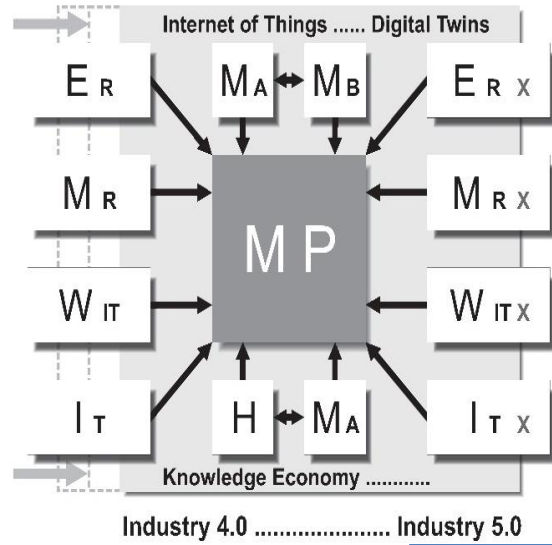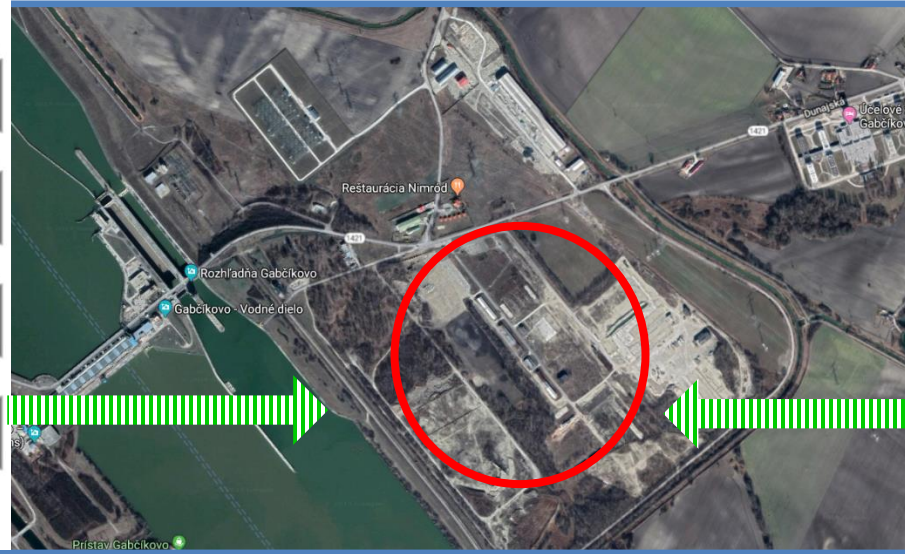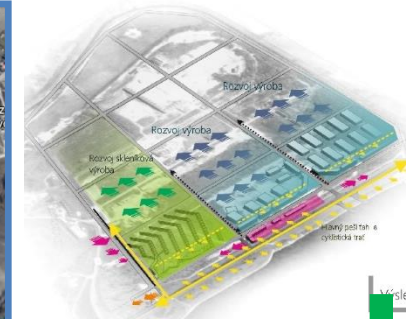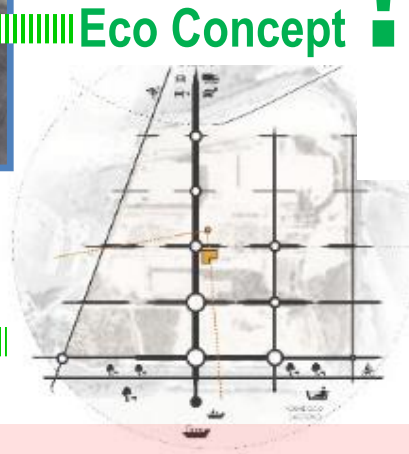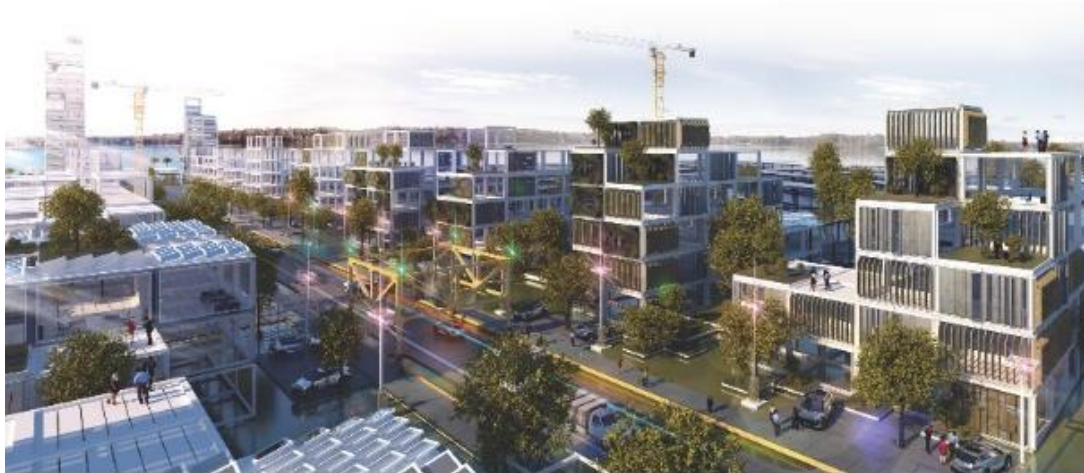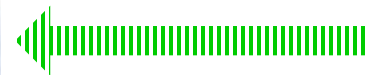

Megatrends influence

$M_A$  to  $M_B$  communication

$E_{R-X}$  - Energy renewable

$M_{R-X}$  - Material recycled

$W_{IT-X}$  - Work with Information Technology

*Example: Study of SCIENCE TECHNOLOGY CENTER- GABCIKOVO*  
*Authors research and diploma thesis\_Matus Godis \_ supervisor Meziani*
